# Supplementary material
Source: PubMed Central journal article supplement (PMC3306532)

**Supplementary table 1.** Univariate analysis of MFS, RFS, and OS in the NKI-295 cohort.

|                      | MFS                     |                   | RFS                     |                   | OS                      |                   |
|----------------------|-------------------------|-------------------|-------------------------|-------------------|-------------------------|-------------------|
|                      | HR (95% CI)             | P                 | HR (95% CI)             | P                 | HR (95% CI)             | P                 |
| Age                  | <b>0.51 (0.31-0.84)</b> | <b>0.0085</b>     | <b>0.42 (0.27-0.65)</b> | <b>0.0001</b>     | <b>0.42 (0.26-0.73)</b> | <b>0.0017</b>     |
| ER                   | <b>0.46 (0.27-0.78)</b> | <b>0.0039</b>     | <b>0.47 (0.29-0.75)</b> | <b>0.0015</b>     | <b>0.20 (0.12-0.36)</b> | <b>&lt;0.0001</b> |
| Size                 | <b>2.17(1.42-3.32)</b>  | <b>0.0003</b>     | <b>1.78 (1.23-2.59)</b> | <b>0.0024</b>     | <b>2.17 (1.38-3.40)</b> | <b>0.0008</b>     |
| Grade 2 vs 1         | <b>2.44 (1.30-4.59)</b> | <b>0.0056</b>     | <b>2.15 (1.25-3.69)</b> | <b>0.0056</b>     | <b>3.26 (1.54-6.89)</b> | <b>0.002</b>      |
| Grade 3 vs 1         | <b>3.27 (1.94-5.49)</b> | <b>&lt;0.0001</b> | <b>2.91(1.84-4.59)</b>  | <b>&lt;0.0001</b> | <b>2.46 (2.62-7.60)</b> | <b>&lt;0.0001</b> |
| Node 1-3 vs 0        | <b>0.56 (0.35-0.89)</b> | <b>0.0156</b>     | 0.71 (0.47-1.07)        | 0.0976            | 0.68 (0.41-1.11)        | 0.1251            |
| Node >3 vs 0         | <b>1.90 (1.03-3.52)</b> | <b>0.0406</b>     | <b>1.72 (0.98-2.99)</b> | <b>0.0572</b>     | 1.67 (0.86-3.25)        | 0.1336            |
| Treatment            | 0.70 (0.46-1.07)        | 0.0964            | 0.76 (0.53-1.10)        | 0.1506            | 0.83 (0.53-1.29)        | 0.4072            |
| <i>IGFBP1</i>        | 1.17 (0.51-2.65)        | 0.7154            | 1.32 (0.64-2.71)        | 0.4511            | 0.85 (0.37-1.97)        | 0.7073            |
| <i>IGFBP2</i>        | 1.10 (0.66-1.84)        | 0.7101            | 0.99 (0.63-1.55)        | 0.9686            | 0.94 (0.55-1.62)        | 0.8275            |
| <i>IGFBP3</i>        | 0.80 (0.35-1.79)        | 0.5786            | 0.75 (0.37-1.52)        | 0.4185            | 0.49 (0.21-1.16)        | 0.1043            |
| <i>IGFBP4</i>        | 1.04 (0.62-1.76)        | 0.8853            | 0.95 (0.60-1.50)        | 0.8130            | 0.72 (0.42-1.25)        | 0.2439            |
| <b><i>IGFBP5</i></b> | <b>5.39 (2.86-10.2)</b> | <b>&lt;0.0001</b> | <b>2.77 (1.59-4.82)</b> | <b>0.0003</b>     | <b>2.87 (1.47-5.58)</b> | <b>0.0020</b>     |
| <i>IGFBP6</i>        | 1.09 (0.33-3.60)        | 0.8894            | 0.83 (0.30-2.35)        | 0.7237            | 1.42 (0.38-5.37)        | 0.6058            |

**Supplementary table 2.** Multivariate analysis of MFS, RFS, and OS in the NKI-295 cohort.

|                      | MFS                     |                   | RFS                     |               | OS                       |               |
|----------------------|-------------------------|-------------------|-------------------------|---------------|--------------------------|---------------|
|                      | HR (95% CI)             | P                 | HR (95% CI)             | P             | HR (95% CI)              | P             |
| Age                  | 0.76 (1.12-1.32)        | 0.1618            | 0.92 (0.62-1.37)        | 0.6707        | 0.74 (0.49-1.13)         | 0.1619        |
| ER                   | <b>0.45 (0.24-0.84)</b> | <b>0.0130</b>     | <b>0.50 (0.27-0.98)</b> | <b>0.0432</b> | <b>0.32 (0.17-0.60)</b>  | <b>0.0004</b> |
| Size                 | <b>2.05 (1.23-3.55)</b> | <b>0.0051</b>     | 1.02 (0.66-1.59)        | 0.9247        | <b>1.69 (1.00-3.04)</b>  | <b>0.0504</b> |
| Grade 2 vs 1         | <b>2.07 (1.00-4.72)</b> | <b>0.0500</b>     | 0.62 (0.36-1.08)        | 0.0947        | <b>3.60 (1.37-12.37)</b> | <b>0.0076</b> |
| Grade 3 vs 1         | 2.14 (0.98-5.09)        | 0.0556            | 0.86 (0.48-1.52)        | 0.5975        | <b>5.13 (1.90-17.90)</b> | <b>0.0007</b> |
| Node 1-3 vs 0        | 0.82 (0.39-1.66)        | 0.5923            | 1.00 (0.48-2.00)        | 0.9936        | 0.92 (0.41-1.95)         | 0.8308        |
| Node >3 vs 0         | 1.81 (0.80-3.91)        | 0.1518            | 1.54 (0.65-3.46)        | 0.3178        | 1.51 (0.62-3.46)         | 0.3534        |
| Treatment            | 0.62 (0.31-1.26)        | 0.1836            | 0.78 (0.39-1.60)        | 0.4935        | 0.94 (0.45-2.03)         | 0.8739        |
| <i>IGFBP1</i>        | 0.51 (0.17-1.58)        | 0.2404            | 0.36 (0.12-1.13)        | 0.0792        | 0.65 (0.19-2.21)         | 0.4844        |
| <i>IGFBP2</i>        | 0.99 (0.46-2.19)        | 0.9869            | 0.80 (.36-1.76)         | 0.5735        | 1.39 (0.63-3.08)         | 0.4127        |
| <i>IGFBP3</i>        | 1.45 (0.23-8.41)        | 0.6880            | 1.85 (0.30-10.21)       | 0.5000        | 0.54 (0.08-3.59)         | 0.5271        |
| <i>IGFBP4</i>        | 1.52 (0.41-5.47)        | 0.5291            | 2.92 (0.81-10.38)       | 0.1001        | 1.38 (0.38-4.85)         | 0.6237        |
| <b><i>IGFBP5</i></b> | <b>4.71 (2.44-8.96)</b> | <b>&lt;0.0001</b> | <b>3.22 (1.56-6.43)</b> | <b>0.0018</b> | <b>2.42 (1.18-4.85)</b>  | <b>0.0172</b> |
| <i>IGFBP6</i>        | 0.91 (0.23-3.38)        | 0.8874            | 1.01 (0.27-3.58)        | 0.9861        | 0.53 (0.12-2.31)         | 0.3986        |

S1A

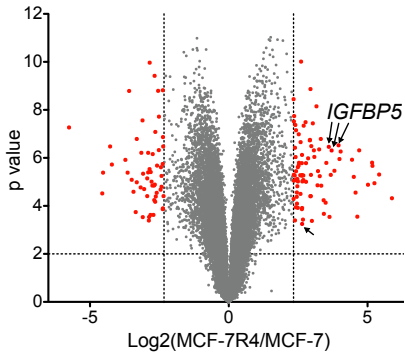

S1B

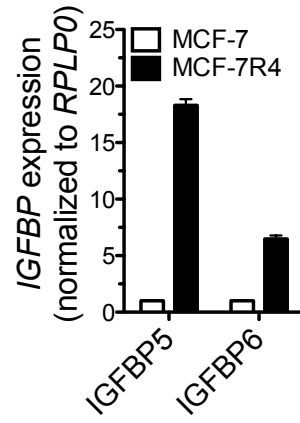

S1C

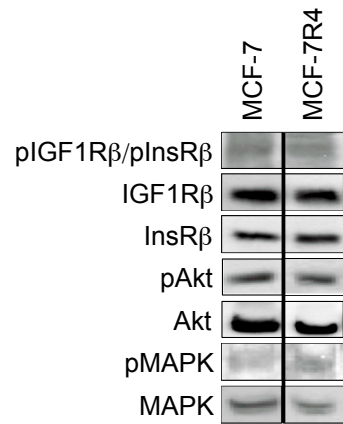

S1D

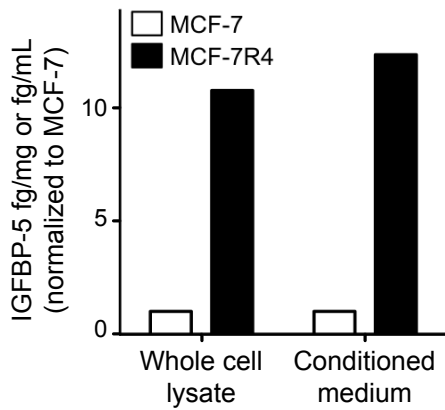

S1E

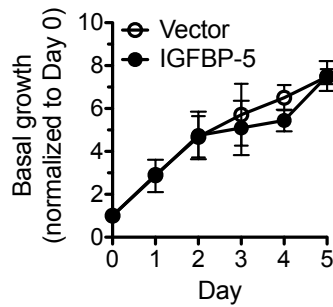

S1F

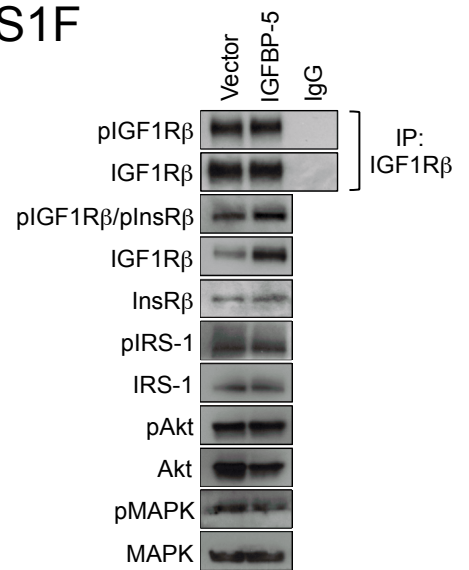

Supplement: NIHMS352685-supplement-1.pdf [file NIHMS352685-supplement-1.pdf]
